# Supplementary material for: Development of Chrysoperla carnea (Stephens) (Neuroptera: Chrysopidae) on pollen from Bt-transgenic and conventional maize
Source: PubMed Central journal article supplement — Sci Rep. 2014 Jul 31;4:5900. doi: 10.1038/srep05900 (PMC5376203; doi:10.1038/srep05900), 2014-07-31
Supplement: srep05900-s1.pdf [file srep05900-s1.pdf]

## **Supporting Information**

### **Development of *Chrysoperla carnea* (Stephens) (Neuroptera: Chrysopidae) on pollen from Bt-transgenic and conventional maize**

Michael Meissle\*, Jan Zünd, Mario Waldburger, Jörg Romeis

Agroscope, Institute for Sustainability Sciences ISS, Reckenholzstrasse 191, 8046 Zurich,  
Switzerland

\* Corresponding author: [michael.meissle@agroscope.admin.ch](mailto:michael.meissle@agroscope.admin.ch)

**Table S1.**

Published evidence that consumption of maize pollen improves life-table parameters of predatory arthropods. Non-predatory stages (e.g., adult *C. carnea*, adult syrphids, etc.) are not included. Evidence without direct demonstration of benefits on life-table parameters is not included. References mainly from Lundgren et al. (2009) and a literature search in Web of Knowledge on 26 July 2013, with search string: (maize or corn) AND pollen AND predator\*. Taxonomy verified with Catalogue of Life (<http://www.catalogueoflife.org/col/search/all>) and Fauna Europaea (<http://www.faunaeur.org/index.php>). Names that could not be verified are marked with \*.

| Order                                        | Family          | Species                                         | Stage                                                                                                                            | References                                                              |
|----------------------------------------------|-----------------|-------------------------------------------------|----------------------------------------------------------------------------------------------------------------------------------|-------------------------------------------------------------------------|
| Acari                                        | Phytoseiidae    | <i>Amblyseius largoensis</i> (Muma, 1955)       | Juvenile, Adult                                                                                                                  | Kamburov (1971), Mori (1977)                                            |
|                                              |                 | <i>Amblyseius swirskii</i> Athias-Henriot, 1962 | Juvenile, Adult                                                                                                                  | Onzo et al. (2012)                                                      |
|                                              |                 | <i>Euseius ovalis</i> (Evans, 1953)             | Juvenile, Adult                                                                                                                  | Shih et al. (1993), Nguyen & Shih (2012), Nguyen & Shih (2010)          |
|                                              |                 | <i>Euseius scutalis</i> (Athias-Henriot, 1958)  | Juvenile, Adult                                                                                                                  | Elbadry & Elbenhawy (1968), Maoz et al. (2011)                          |
|                                              |                 | <i>Euseius tularensis</i> Congdon, 1985         | Juvenile, Adult                                                                                                                  | McMurtry & Scriven (1964), Swirski et al. (1970), Kennett et al. (1979) |
|                                              |                 | <i>Neoseiulus baraki</i> Athias-Henriot, 1966   | Juvenile, Adult                                                                                                                  | Negloh et al. (2008)                                                    |
|                                              |                 | <i>Neoseiulus californicus</i> (McGregor, 1954) | Juvenile, Adult                                                                                                                  | Swirski et al. (1970), Croft et al. (1998)                              |
|                                              |                 | <i>Neoseiulus cucumeris</i> (Oudemans, 1930)    | Juvenile, Adult                                                                                                                  | Obrist et al. (2006a)                                                   |
|                                              |                 | <i>Neoseiulus fallacis</i> (Garman, 1948)       | Juvenile, Adult                                                                                                                  | Croft et al. (1998); Afifi et al. (1988)                                |
|                                              |                 | <i>Neoseiulus longispinosus</i> (Evans, 1952)   | Juvenile, Adult                                                                                                                  | Mori (1977)                                                             |
|                                              |                 | <i>Neoseiulus paraki</i> (Ehara, 1967)          | Juvenile, Adult                                                                                                                  | Mori (1977)                                                             |
|                                              |                 | <i>Neoseiulus womersleyi</i> (Schicha, 1975)    | Juvenile, Adult                                                                                                                  | Nguyen & Shih (2010), Nguyen & Shih (2010)                              |
|                                              |                 | <i>Typhlodromalus aripo</i> De Leon, 1967       | Juvenile, Adult                                                                                                                  | Gnanvossou et al. (2005)                                                |
|                                              |                 | <i>Typhlodromalus manihoti</i> (Moraes, 1994)*  | Juvenile, Adult                                                                                                                  | Gnanvossou et al. (2005)                                                |
| Araneae                                      | Theridiidae     | <i>Phylloneta impressa</i> (L. Koch, 1881)      | Juvenile                                                                                                                         | Meissle et al. (2009)                                                   |
| Coleoptera                                   | Carabidae       | <i>Agonum cupripenne</i> Say, 1823              | Adult                                                                                                                            | Mullin et al. (2005)                                                    |
|                                              |                 | <i>Agonum muelleri</i> Herbst, 1784             | Adult                                                                                                                            | Mullin et al. (2005)                                                    |
|                                              |                 | <i>Agonum placidum</i> Say, 1823                | Adult                                                                                                                            | Mullin et al. (2005)                                                    |
|                                              |                 | <i>Amara pennsylvanica</i> Hayward, 1908        | Adult                                                                                                                            | Mullin et al. (2005)                                                    |
|                                              |                 | <i>Chlaenius tricolor</i> Dejean, 1826          | Adult                                                                                                                            | Mullin et al. (2005)                                                    |
|                                              |                 | <i>Harpalus affinis</i> (Schrank, 1781)         | Adult                                                                                                                            | Mullin et al. (2005)                                                    |
|                                              |                 | <i>Patrobus longicornis</i> Say, 1825           | Adult                                                                                                                            | Mullin et al. (2005)                                                    |
|                                              |                 | <i>Pterostichus chalcites</i> (Say, 1823)       | Adult                                                                                                                            | Mullin et al. (2005)                                                    |
|                                              |                 | <i>Pterostichus lucublandus</i> (Say, 1823)     | Adult                                                                                                                            | Mullin et al. (2005)                                                    |
|                                              |                 | <i>Pterostichus melanarius</i> (Illiger 1798)   | Adult                                                                                                                            | Mullin et al. (2005)                                                    |
|                                              |                 | <i>Scarites quadriceps</i> Chaudoir, 1843*      | Adult                                                                                                                            | Mullin et al. (2005)                                                    |
|                                              |                 | <i>Harpalus caliginosus</i> (Fabricius, 1775)   | Adult                                                                                                                            | Mullin et al. (2005)                                                    |
|                                              |                 | <i>Harpalus pensylvanicus</i> (De Geer, 1774)   | Adult                                                                                                                            | Mullin et al. (2005)                                                    |
|                                              |                 | Coccinellidae                                   | <i>Coccinella trifasciata</i> Linnaeus, 1758                                                                                     | Juvenile                                                                |
| <i>Coleomegilla maculata</i> (De Geer, 1775) | Juvenile, Adult |                                                 | Lundgren & Wiedenmann (2004), Lundgren et al. (2005), Michaud & Grant (2005), Smith (1960), Smith (1965), Pilorget et al. (2010) |                                                                         |
| <i>Cycloneda sanguinea</i> (Linnaeus, 1763)  | Juvenile        |                                                 | Smith (1961)                                                                                                                     |                                                                         |
| <i>Micraspis discolor</i> (Fabricius, 1798)  | Juvenile, Adult |                                                 | Omkar (2006)                                                                                                                     |                                                                         |
| Hemiptera                                    | Anthocoridae    | <i>Orius insidiosus</i> (Say, 1832)             | Juvenile                                                                                                                         | Pilcher et al. (1997)                                                   |
|                                              |                 | <i>Orius majusculus</i> (Reuter, 1879)          | Juvenile, Adult                                                                                                                  | Obrist et al. (2006b), Lumbierres et al. (2012)                         |
|                                              |                 | <i>Orius sauteri</i> (Poppius, 1909)*           | Juvenile                                                                                                                         | Funau & Yoshiyasu (1995)                                                |
|                                              |                 | <i>Orius vicinus</i> (Ribaut, 1923)             | Juvenile                                                                                                                         | Fauvel (1974)                                                           |
| Neuroptera                                   | Chrysopidae     | <i>Chrysoperla carnea</i> (Stephens, 1836)      | Juvenile                                                                                                                         | present study                                                           |

## References to Table S1:

- Afifi, A.M., Potts, M.F., Patterson, C.G., & Rodriguez, J.G. (1988) Pollen diet of some predator mites. *Transactions of the Kentucky Academy of Sciences*, 49, 96–100.
- Croft, B. A., Monetti, L. N. & Pratt, P. D. (1998) Comparative life histories and predation types: Are *Neoseiulus californicus* and *N. fallacis* (Acarina: Phytoseiidae) similar type II selective predators of spider mites? *Environmental Entomology* 27: 531–538.
- Gnavvossou, D., Hanna, R., Yaninek, J. S. & Toko, M. (2005) Comparative life history traits of three neotropical phytoseiid mites maintained on plant-based diets. *Biological Control* 35, 32–39.
- Elbadry, E.A. & Elbenhawy, E.M. (1968) The effect of non-prey food, mainly pollen, on the development, survival, and fecundity of *Amblyseius gossypii* (Acarina: Phytoseiidae). *Entomologia Experimentalis et Applicata*, 11, 269–272.
- Fauvel, G. (1974) Sur l'alimentation pollinique d'un anthocoride predateur *Orius* (*Heterorius*) *vicinus* Rib. (Hemiptere). *Annales de Zoologie Ecologie Animale*, 6 (2), 245–258.
- Funau, T. & Yoshiyasu, Y. (1995) Development and fecundity of *Orius sauteri* (Hemiptera: Anthocoridae) reared on *Aphis gossypii* Glover and corn pollen. *Japanese Journal of Applied Entomology and Zoology*, 39, 84–85.
- Kamburov, S.S. (1971) Feeding, development, and reproduction of *Amblyseius largoensis* on various food substances. *Journal of Economic Entomology*, 64, 643–648.
- Kennett, C.E., Flaherty, D.L., & Hoffmann, R.W. (1979) Effect of wind-borne pollens on the population dynamics of *Amblyseius hibisci* [Acarina: Phytoseiidae]. *Entomophaga*, 24, 83–98.
- Lumbierres, B., Albajes, R. & Pons, X. (2012) Positive effect of Cry1Ab-expressing Bt maize on the development and reproduction of the predator *Orius majusculus* under laboratory conditions. *Biological Control* 63, 150–156.
- Lundgren, J. G. (2009) Relationships of Natural Enemies and Non-Prey Foods. Springer Science + Business Media B. V.
- Lundgren, J.G., Huber, A., & Wiedenmann, R.N. (2005) Quantification of consumption of corn pollen by the predator *Coleomegilla maculata* (Coleoptera: Coccinellidae) during anthesis in an Illinois cornfield. *Agricultural and Forest Entomology*, 7, 53–60.
- Lundgren, J.G. & Wiedenmann, R.N. (2004) Nutritional suitability of corn pollen for the predator *Coleomegilla maculata* (Coleoptera: Coccinellidae). *Journal of Insect Physiology*, 50, 567–575.
- Maoz, Y., Gal, S., Argov, Y., Coll, M. & Palevsky, E. (2011) Biocontrol of persea mite, *Oligonychus perseae*, with an exotic spider mite predator and an indigenous pollen feeder. *Biological Control* 59, 147–157.
- McMurtry, J.A. & Scriven, G.T. (1964) Studies on the feeding, reproduction, and development of *Amblyseius hibisci* (Acarina: Phytoseiidae) on various food substances. *Annals of the Entomological Society of America*, 57, 649–655.
- Meissle, M. & Romeis, J. (2009) The web-building spider *Theridion impressum* (Araneae: Theridiidae) is not adversely affected by Bt maize resistant to corn rootworms. *Plant Biotechnology Journal* 7, 645–656.
- Michaud, J.P. & Grant, A.K. (2005) Suitability of pollen sources for the development and reproduction of *Coleomegilla maculata* (Coleoptera: Coccinellidae) under simulated drought conditions. *Biological Control*, 32, 363–370.
- Mori, H. (1977) Notes on the biology of phytoseiid mites (Acarina: Phytoseiidae) as predators of tetranychid mites in Japan. *Review of Plant Protection Research*, 10, 91–101.
- Mullin, C.A., Saunders, M.C., II, Leslie, T.W., Biddinger, D.J., & Fleischer, S.J. (2005) Toxic and behavioral effects to Carabidae of seed treatments used on Cry3Bb1- and Cry1Ab/c-protected corn. *Environmental Entomology*, 34, 1626–1636.
- Negloh, K., Hanna, R. & Schausberger, P. Comparative demography and diet breadth of Brazilian and African populations of the predatory mite *Neoseiulus baraki*, a candidate for biological control of coconut mite. *Biological Control* 46, 523–531.
- Nguyes, T. V. & Shih, C. I. T. (2010) Development of *Neoseiulus womersleyi* (Schicha) and *Euseius ovalis* (Evans) feeding on four tetranychid mites (Acarina: Phytoseiidae, Tetranychidae) and pollen. *Journal of Asia-Pacific Entomology* 13, 289–296.
- Nguyes, T. V. & Shih, C. I. T. (2012) Life-table parameters of *Neoseiulus womersleyi* (Schicha) and *Euseius ovalis* (Evans) (Acarina: Phytoseiidae) feeding on six food sources. *International Journal of Acarology* 38, 197–205.
- Obrist, L. B., Klein, H., Dutton, A. & Bigler, F. (2006a) Assessing the effects of Bt maize on the predatory mite *Neoseiulus cucumeris*. *Experimental and Applied Acarology* 38, 125–139.
- Obrist, L.B., Dutton, A., Albajes, R., & Bigler, F. (2006b) Exposure of arthropod predators to Cry1Ab toxin in Bt maize fields. *Ecological Entomology*, 31, 143–154.
- Omkar (2006) Suitability of different foods for a generalist ladybird, *Micraspis discolor* (Coleoptera: Coccinellidae). *International Journal of Tropical Insect Science*, 26, 35–40.
- Onzo, A., Houedokoho, A. F. & Hanna, R. (2012) Potential of the predatory mite, *Amblyseius swirskii* to suppress the broad mite, *Polyphagotarsonemus latus* on the gboma eggplant, *Solanum macrocarpon*. *Journal of Insect Science*, 12, Article 7.
- Pilcher, C. D., Obrycki, J. J., Rice, M. E. & Lewis, L. C. Preimaginal development, survival, and field abundance of insect predators on transgenic *Bacillus thuringiensis* corn. *Environ. Entomol.* 26, 446–454 (1997).
- Pilorget, L., Buckner, J. & Lundgren, J. G. Sterol limitation in a pollen-fed omnivorous lady beetle (Coleoptera: Coccinellidae). *Journal of Insect Physiology* 56, 81–87 (2010).
- Shih, C. I. T., Chang, H. Y., Hsu, P. H. & Hwang, Y. F. (1993) Responses of *Amblyseius ovalis* (Evans) (Acarina: Phytoseiidae) to natural food resources and two artificial diets. *Experimental & Applied Acarology* 17, 503–519.
- Smith, B.C. (1960) A technique for rearing coccinellid beetles on dry foods, and influence of various pollens on the development of *Coleomegilla maculata* Legni Timb. (Coleoptera: Coccinellidae). *Canadian Journal of Zoology*, 38, 1047–1049
- Smith, B. C. (1961) Results of rearing some coccinellid (Coleoptera: Coccinellidae) larvae on various pollens. *Proceedings of the Entomological Society of Ontario*, 91, 270–271.
- Smith, B. C. (1965) Growth and development of coccinellid larvae on dry foods (Coleoptera: Coccinellidae), *Canadian Entomologist* 97, 760–768.
- Swirski, E., Amitai, S., & Dorzia, N. (1970) Laboratory studies on the feeding habits, postembryonic survival and oviposition of the predaceous mites *Amblyseius chilensis* Dosse and *Amblyseius hibisci* Hant [Acarina: Phytoseiidae] on various kinds of food substances. *Entomophaga*, 15, 93–106.

## Table S2.

Matrix showing all differences in percentages for each combination of pollen batch × cultivar for the pollen parameters A) total protein, B) C:N ratio, and C) grain diameter. Two batches of maize were grown consecutively in the same glasshouse. Bt maize cultivars are indicated in grey shades. Statistical comparisons were conducted within each batch. Significant differences are marked in red, insignificant comparisons in green. Differences between batch 1 and 2 of the same cultivar are marked in orange. Values were calculated using the following formula:

% in table = (mean value of treatment in row / mean value of treatment in column - 1)\*100

Example: Difference of total protein Gavott batch 1 and Compa CB batch 1:

% in table =  $(10.2 / 7.5 - 1) * 100 = 36$

Interpretation: total protein in maize Gavott batch 1 is 36% larger than in maize Compa CB batch 1.

### A) Total protein

| Batch |                                                                                          | 1                | 1       | 1              | 1       | 1                   | 1      | 1        | 1          | 1      | 2                | 2       | 2                   | 2      | 2        | 2      |
|-------|------------------------------------------------------------------------------------------|------------------|---------|----------------|---------|---------------------|--------|----------|------------|--------|------------------|---------|---------------------|--------|----------|--------|
|       | Total protein in maize [row] is [value] % smaller/larger [-/+]<br>than in maize [column] | MON88017<br>(Bt) | DKC5143 | MON810<br>(Bt) | DKC3420 | Compa<br>CB<br>(Bt) | Dracma | Radiance | Rheintaker | Gavott | MON88017<br>(Bt) | DKC5143 | Compa<br>CB<br>(Bt) | Dracma | Radiance | Gavott |
| 1     | MON88017(Bt)                                                                             | 0                | -1      | 27             | 3       | 28                  | 5      | 0        | -2         | -6     | -9               | -17     | -14                 | -2     | -20      | -13    |
| 1     | DKC5143                                                                                  | 1                | 0       | 27             | 3       | 28                  | 6      | 1        | -2         | -6     | -8               | -16     | -13                 | -2     | -19      | -13    |
| 1     | MON810 (Bt)                                                                              | -21              | -21     | 0              | -19     | 1                   | -17    | -21      | -23        | -26    | -28              | -34     | -32                 | -23    | -36      | -31    |
| 1     | DKC3420                                                                                  | -3               | -3      | 23             | 0       | 24                  | 3      | -3       | -5         | -9     | -11              | -19     | -16                 | -5     | -22      | -15    |
| 1     | Compa CB (Bt)                                                                            | -22              | -22     | -1             | -20     | 0                   | -17    | -22      | -23        | -26    | -29              | -35     | -32                 | -24    | -37      | -32    |
| 1     | Dracma                                                                                   | -5               | -6      | 20             | -3      | 21                  | 0      | -5       | -7         | -11    | -14              | -21     | -18                 | -7     | -24      | -18    |
| 1     | Radiance                                                                                 | 0                | -1      | 27             | 3       | 28                  | 5      | 0        | -2         | -6     | -9               | -17     | -14                 | -2     | -20      | -13    |
| 1     | Rheintaler                                                                               | 2                | 2       | 29             | 5       | 31                  | 8      | 2        | 0          | -4     | -7               | -15     | -12                 | 0      | -18      | -11    |
| 1     | Gavott                                                                                   | 7                | 6       | 35             | 9       | 36                  | 12     | 7        | 4          | 0      | -3               | -11     | -8                  | 4      | -14      | -7     |
| 2     | MON88017(Bt)                                                                             | 10               | 9       | 39             | 13      | 40                  | 16     | 10       | 7          | 3      | 0                | -9      | -5                  | 7      | -12      | -5     |
| 2     | DKC5143                                                                                  | 20               | 20      | 52             | 23      | 53                  | 27     | 20       | 18         | 13     | 10               | 0       | 4                   | 17     | -3       | 5      |
| 2     | Compa CB (Bt)                                                                            | 16               | 15      | 47             | 19      | 48                  | 22     | 16       | 13         | 9      | 6                | -3      | 0                   | 13     | -7       | 1      |
| 2     | Dracma                                                                                   | 3                | 2       | 30             | 5       | 31                  | 8      | 3        | 0          | -4     | -7               | -15     | -12                 | 0      | -18      | -11    |
| 2     | Radiance                                                                                 | 24               | 24      | 57             | 28      | 59                  | 31     | 24       | 22         | 17     | 13               | 3       | 7                   | 21     | 0        | 8      |
| 2     | Gavott                                                                                   | 15               | 14      | 46             | 18      | 47                  | 21     | 15       | 12         | 8      | 5                | -4      | -1                  | 12     | -7       | 0      |

### B) C:N ratio

| Batch |                                                                                     | 1                | 1       | 1              | 1       | 1                   | 1      | 1        | 1          | 1      | 2                | 2       | 2                   | 2      | 2        | 2      |
|-------|-------------------------------------------------------------------------------------|------------------|---------|----------------|---------|---------------------|--------|----------|------------|--------|------------------|---------|---------------------|--------|----------|--------|
|       | CN ratio in maize [row] is [value] % smaller/larger [-/+]<br>than in maize [column] | MON88017<br>(Bt) | DKC5143 | MON810<br>(Bt) | DKC3420 | Compa<br>CB<br>(Bt) | Dracma | Radiance | Rheintaker | Gavott | MON88017<br>(Bt) | DKC5143 | Compa<br>CB<br>(Bt) | Dracma | Radiance | Gavott |
| 1     | MON88017(Bt)                                                                        | 0                | 0       | -16            | -10     | 3                   | 1      | -4       | 3          | -3     | 2                | 5       | 1                   | -1     | 6        | -6     |
| 1     | DKC5143                                                                             | 0                | 0       | -15            | -10     | 4                   | 1      | -4       | 3          | -2     | 3                | 5       | 2                   | -1     | 6        | -5     |
| 1     | MON810 (Bt)                                                                         | 18               | 18      | 0              | 6       | 22                  | 19     | 13       | 21         | 15     | 21               | 24      | 20                  | 17     | 25       | 12     |
| 1     | DKC3420                                                                             | 12               | 11      | -6             | 0       | 15                  | 12     | 7        | 14         | 9      | 14               | 17      | 13                  | 10     | 18       | 6      |
| 1     | Compa CB (Bt)                                                                       | -3               | -3      | -18            | -13     | 0                   | -2     | -7       | -1         | -6     | -1               | 2       | -2                  | -4     | 3        | -8     |
| 1     | Dracma                                                                              | -1               | -1      | -16            | -11     | 2                   | 0      | -5       | 2          | -3     | 2                | 4       | 1                   | -2     | 5        | -6     |
| 1     | Radiance                                                                            | 4                | 4       | -12            | -6      | 8                   | 5      | 0        | 7          | 2      | 7                | 9       | 6                   | 3      | 10       | -1     |
| 1     | Rheintaler                                                                          | -2               | -3      | -18            | -13     | 1                   | -2     | -7       | 0          | -5     | 0                | 2       | -1                  | -4     | 3        | -8     |
| 1     | Gavott                                                                              | 3                | 2       | -13            | -8      | 6                   | 3      | -2       | 5          | 0      | 5                | 8       | 4                   | 1      | 9        | -3     |
| 2     | MON88017(Bt)                                                                        | -2               | -3      | -17            | -12     | 1                   | -2     | -6       | 0          | -5     | 0                | 2       | -1                  | -4     | 3        | -8     |
| 2     | DKC5143                                                                             | -4               | -5      | -19            | -14     | -2                  | -4     | -9       | -2         | -7     | -2               | 0       | -3                  | -6     | 1        | -10    |
| 2     | Compa CB (Bt)                                                                       | -1               | -2      | -16            | -11     | 2                   | -1     | -5       | 1          | -4     | 1                | 3       | 0                   | -2     | 5        | -7     |
| 2     | Dracma                                                                              | 1                | 1       | -14            | -9      | 5                   | 2      | -3       | 4          | -1     | 4                | 6       | 3                   | 0      | 7        | -4     |
| 2     | Radiance                                                                            | -5               | -6      | -20            | -15     | -2                  | -5     | -9       | -3         | -8     | -3               | -1      | -4                  | -7     | 0        | -11    |
| 2     | Gavott                                                                              | 6                | 5       | -11            | -5      | 9                   | 6      | 1        | 9          | 3      | 8                | 11      | 7                   | 4      | 12       | 0      |

### C) Pollen diameter

| Batch |                                                                                     | 1                | 1       | 1              | 1       | 1                   | 1      | 1        | 1          | 1      | 2                | 2       | 2                   | 2      | 2        | 2      |
|-------|-------------------------------------------------------------------------------------|------------------|---------|----------------|---------|---------------------|--------|----------|------------|--------|------------------|---------|---------------------|--------|----------|--------|
|       | Diameter in maize [row] is [value] % smaller/larger [-/+]<br>than in maize [column] | MON88017<br>(Bt) | DKC5143 | MON810<br>(Bt) | DKC3420 | Compa<br>CB<br>(Bt) | Dracma | Radiance | Rheintaker | Gavott | MON88017<br>(Bt) | DKC5143 | Compa<br>CB<br>(Bt) | Dracma | Radiance | Gavott |
| 1     | MON88017(Bt)                                                                        | 0                | 0       | -4             | -3      | -6                  | 7      | -3       | -1         | 2      | 4                | 5       | 0                   | -1     | -3       | -3     |
| 1     | DKC5143                                                                             | 0                | 0       | -5             | -3      | -7                  | 7      | -3       | -1         | 2      | 4                | 5       | 0                   | -1     | -3       | -3     |
| 1     | MON810 (Bt)                                                                         | 5                | 5       | 0              | 1       | -2                  | 12     | 2        | 4          | 7      | 9                | 10      | 5                   | 4      | 2        | 1      |
| 1     | DKC3420                                                                             | 3                | 4       | -1             | 0       | -3                  | 11     | 1        | 3          | 5      | 8                | 9       | 4                   | 2      | 1        | 0      |
| 1     | Compa CB (Bt)                                                                       | 7                | 7       | 2              | 3       | 0                   | 14     | 4        | 6          | 9      | 11               | 12      | 7                   | 6      | 4        | 3      |
| 1     | Dracma                                                                              | -7               | -6      | -11            | -10     | -13                 | 0      | -9       | -7         | -5     | -3               | -2      | -6                  | -7     | -9       | -10    |
| 1     | Radiance                                                                            | 3                | 3       | -2             | -1      | -4                  | 10     | 0        | 2          | 5      | 7                | 8       | 3                   | 2      | 0        | 0      |
| 1     | Rheintaler                                                                          | 1                | 1       | -4             | -3      | -6                  | 8      | -2       | 0          | 3      | 5                | 6       | 1                   | 0      | -2       | -2     |
| 1     | Gavott                                                                              | -2               | -2      | -6             | -5      | -8                  | 5      | -4       | -3         | 0      | 2                | 3       | -2                  | -3     | -5       | -5     |
| 2     | MON88017(Bt)                                                                        | -4               | -4      | -8             | -7      | -10                 | 3      | -7       | -5         | -2     | 0                | 1       | -4                  | -5     | -7       | -7     |
| 2     | DKC5143                                                                             | -5               | -5      | -9             | -8      | -11                 | 2      | -7       | -5         | -3     | -1               | 0       | -5                  | -6     | -7       | -8     |
| 2     | Compa CB (Bt)                                                                       | 0                | 0       | -5             | -4      | -7                  | 7      | -3       | -1         | 2      | 4                | 5       | 0                   | -1     | -3       | -3     |
| 2     | Dracma                                                                              | 1                | 1       | -4             | -2      | -5                  | 8      | -2       | 0          | 3      | 5                | 6       | 1                   | 0      | -2       | -2     |
| 2     | Radiance                                                                            | 3                | 3       | -2             | -1      | -4                  | 10     | 0        | 2          | 5      | 7                | 8       | 3                   | 2      | 0        | 0      |
| 2     | Gavott                                                                              | 3                | 3       | -1             | 0       | -3                  | 11     | 0        | 3          | 5      | 8                | 8       | 4                   | 2      | 0        | 0      |
